# Supplementary material for: Dopamine D4 Receptor Is a Regulator of Morphine-Induced Plasticity in the Rat Dorsal Striatum
Source: MDPI journal article supplement (doi:10.3390/cells11010031), 2021-12-23
Supplement: s1 [file s1]

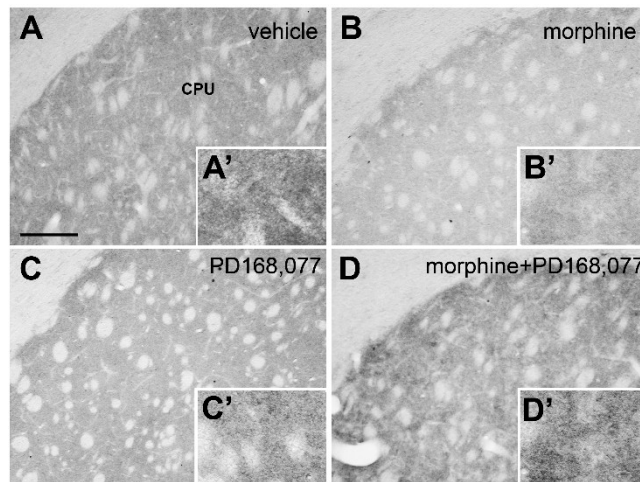

**Supplementary Figure S1. Changes in spinophilin IR in the CPu after continuous administration of morphine and/or PD168,077.** Representative photomicrographs showing the effect of 14 days of continuous treatment with vehicle (**A**), morphine (20 mg/kg/d) (**B**), PD168,077 (1 mg/kg/d) (**C**) and morphine + PD168,077 (20 mg/kg/d and 1 mg/kg/d) (**D**) on spinophilin immunoreactivity (IR) in the caudate putamen (CPu). (**A'**-**D'**) High magnification photomicrographs showing punctate spinophilin IR in the CPu. Scale bar is 100  $\mu$ m for A-D and 40  $\mu$ m for A'-D'.
