# Supplementary material for: Dopamine D4 Receptor Is a Regulator of Morphine-Induced Plasticity in the Rat Dorsal Striatum
Source: MDPI journal article supplement (doi:10.3390/cells11010031), 2021-12-23
Supplement: s1 [file s1]

**Table S1.** Secondary antibodies used for immunohistochemistry and western blot.

| <b>Antibody</b>   | <b>Conjugate</b> | <b>Specie</b> | <b>Source</b>       | <b>Dilution</b> |
|-------------------|------------------|---------------|---------------------|-----------------|
| <b>Rabbit IgG</b> | Biotin           | goat          | Vector Laboratories | 1:500 (IMQ)     |
| <b>Rabbit IgG</b> | Alexa 488        | donkey        | Thermo Fisher       | 1:1,000 (IF)    |
| <b>Mouse IgG</b>  | Alexa 568        | donkey        | Thermo Fisher       | 1:1,000 (IF)    |
| <b>Mouse IgG</b>  | HRP              | Goat          | Vector Laboratories | 1:500 (WB)      |
| <b>Goat IgG</b>   | Alexa 568        | horse         | Thermo Fisher       | 1:1,000 (IF)    |

Abbreviations: IMQ: immunohistochemistry; IF: immunofluorescence; WB: western blot.
